# Supplementary material for: Concentration-Dependent Attenuation of Pro-Fibrotic Responses after Cannabigerol Exposure in Primary Rat Hepatocytes Cultured in Palmitate and Fructose Media
Source: MDPI journal article supplement (doi:10.3390/cells12182243), 2023-09-09
Supplement: s1 [file s1]

*1.1. Concentration-dependent influence of cannabigerol on transforming growth factor beta 1 changes in post-incubation media and primary rat hepatocytes exposed to palmitate in combination with fructose*

An increment in the protein expression of TGF- $\beta$ 1 was detected in both PA-F groups (+64.9% and +67.2%,  $p < 0.05$ , Figure S1A and S1B, respectively). The TGF- $\beta$ 1 protein expression was increased after hepatocytes treatment with 5 $\mu$ M CBG and 10 $\mu$ M CBG alone or in combination with PA-F exposure (+33.7%, +33.2%, +82.2% and +5.5%,  $p < 0.05$ , Figure S1A, respectively) compared to the Control group. In relation to the PA-F group, the protein expression of TGF- $\beta$ 1 was reduced in lysates of hepatocytes exposed to PA-F and 10 $\mu$ M CBG (-36.0%,  $p < 0.05$ , Figure S1A). In the protein expression of TGF- $\beta$ 1, we also noticed a decrease after hepatocytes treatment with 15 $\mu$ M CBG alone (-32.0%,  $p < 0.05$ , Figure S1B) and an increase after hepatocytes treatment with 15 $\mu$ M CBG in the PA-F condition (+70.3%,  $p < 0.05$ , Figure S1B) in relation to the Control group. In addition, the TGF- $\beta$ 1 protein expression was enhanced in the PA-F + 25 $\mu$ M CBG group (+160.4% and +55.8%,  $p < 0.05$ , Figure S1B) and lowered in the PA-F + 30 $\mu$ M CBG group (-13.4% and -48.2%,  $p < 0.05$ , Figure S1B) than in the Control and PA-F groups, respectively.

An increment in the mRNA expression of TGF- $\beta$ 1 was detected in both PA-F (+19.3%, and +26.7%,  $p < 0.05$ , Figure S1C and S1D, respectively). In the PA-F condition, the mRNA expression of TGF- $\beta$ 1 was augmented by 5 $\mu$ M CBG treatment (+7.2%,  $p < 0.05$ , Figure S1C, vs. Control group). In the PA-F + 10 $\mu$ M CBG group, we observed an attenuation in the mRNA expression of TGF- $\beta$ 1 (-14.1%,  $p < 0.05$ , Figure S1C) in relation with the PA-F group. The mRNA expression of TGF- $\beta$ 1 was also significantly changed in experimental group treated with palmitate and fructose with the addition of cannabigerol (PA-F + 15 $\mu$ M CBG: +43.1% and +12.9%, PA-F + 25 $\mu$ M CBG: +60.3% and +26.5%, PA-F + 30 $\mu$ M CBG: -17.6% and -35.0%,  $p < 0.05$ , Figure S1D) compared to the Control and PA-F groups, respectively.

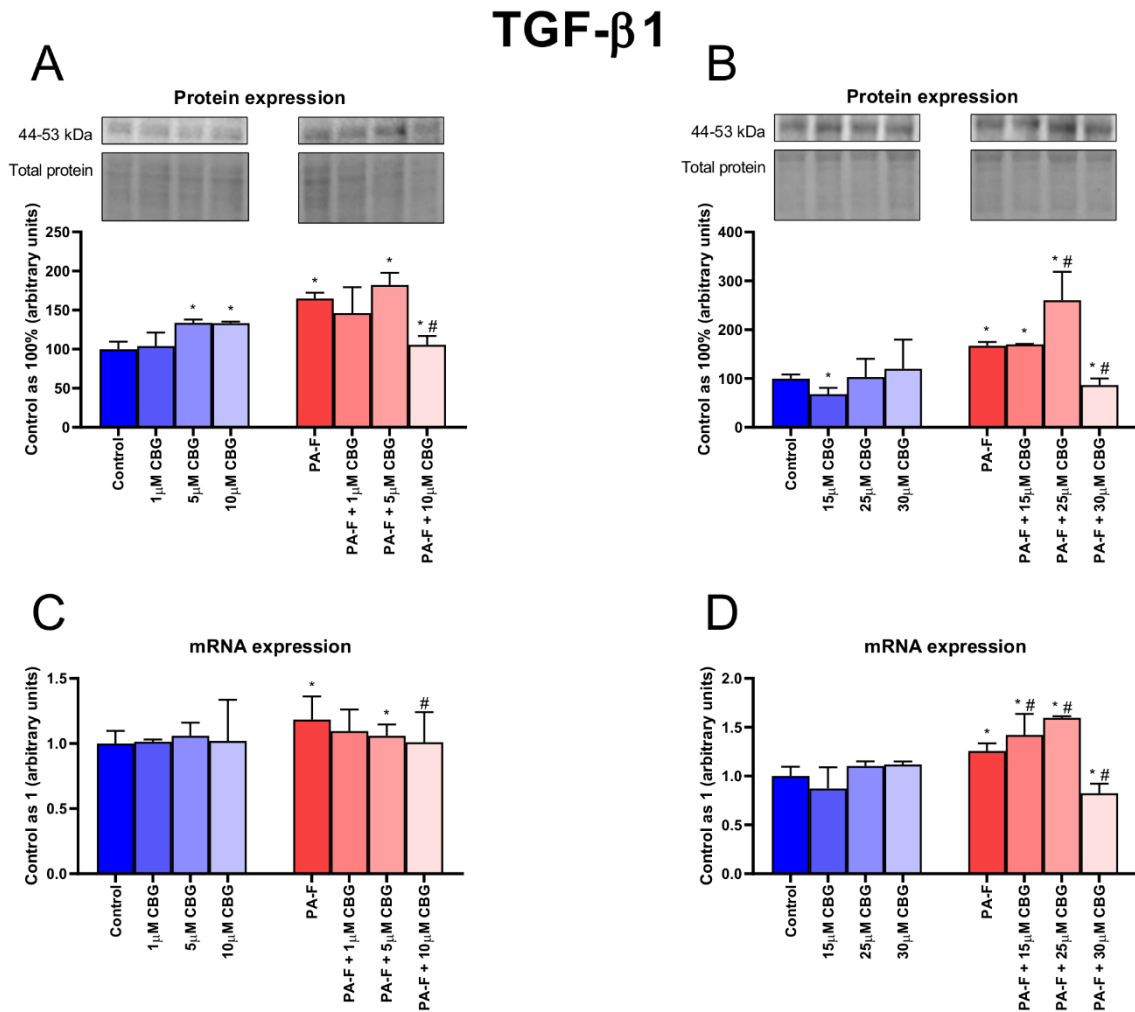

**Figure S1.** The influence of cannabigerol (CBG), in a concentration-dependent manner, on the transforming growth factor beta 1 (TGF- $\beta$ 1) protein expressions (A, B), mRNA expressions (C,D) in hepatocytes exposed to standard media (Control) or palmitate and fructose media (PA-F). The cells were treated with different concentrations of CBG for 48h. The TGF- $\beta$ 1 protein and mRNA expression assays were performed by the Western blot and RT-PCR techniques, respectively. The data were expressed as mean  $\pm$  SD of six independent determinations and presented as a percentage of TGF- $\beta$ 1 changes relative to the Control (set as 100% for Western blot and as 1 for RT-PCR). The significant differences were indicated in comparison with the Control group (\* $p$ <0.05) and PA-F group (\* $p$ <0.05).

### 1.2. Concentration-dependent influence of cannabigerol on matrix metalloproteinase 2 changes in post-incubation media and primary rat hepatocytes exposed to palmitate in combination with fructose

The hepatocytes treatment with 5 $\mu$ M CBG and 10 $\mu$ M CBG in combination with the palmitate and fructose caused a raise in the MMP-2 protein expression (PA-F + 5 $\mu$ M CBG: +92.4% and +74.0%, PA-F + 10 $\mu$ M CBG: +70.2% and +53.9%,  $p$ <0.05, Figure S2A) compared to the Control and PA-F groups, respectively. In the protein expression of MMP-2, we also observed a decrease in the following examined groups: 25 $\mu$ M CBG, 30 $\mu$ M CBG, PA-F + 15 $\mu$ M CBG, PA-F + 25 $\mu$ M CBG, PA-F + 30 $\mu$ M CBG (-25.5%, -27.0%, -34.7%, -40.0%, -39.5%,  $p$ <0.05, Figure S2B, respectively) in relation to the Control group. Moreover, the hepatocytes treatment with high concentration of CBG in the PA-F condition induced a diminishment in the protein expression of MMP-2 (PA-F + 15 $\mu$ M CBG: -38.7%, PA-F + 25 $\mu$ M CBG: -43.4%, PA-F + 25 $\mu$ M CBG: -43.0%,  $p$ <0.05, Figure S2B) than in the PA-F group.

In both PA-F groups, we observed a decrease in the mRNA expression of MMP-2 (-50.0% and -37.0%,  $p$ <0.05, Figure S2E and S2F, respectively). The mRNA expression of MMP-2 was also significantly reduced in selected examined groups (PA-F + 5 $\mu$ M CBG: -26.3%, PA-F + 10 $\mu$ M CBG: -45.8%, PA-F +

15 $\mu$ M CBG: -51.9%, PA-F + 30 $\mu$ M CBG: -55.6%,  $p<0.05$ , Figure S2C and S2D) compared to the proper Control group. We also noticed a decline in the MMP-2 mRNA expression in the hepatocytes treatment with 30 $\mu$ M CBG in the PA-F condition (-29.4%,  $p<0.05$ , Figure S2D, vs. PA-F group).

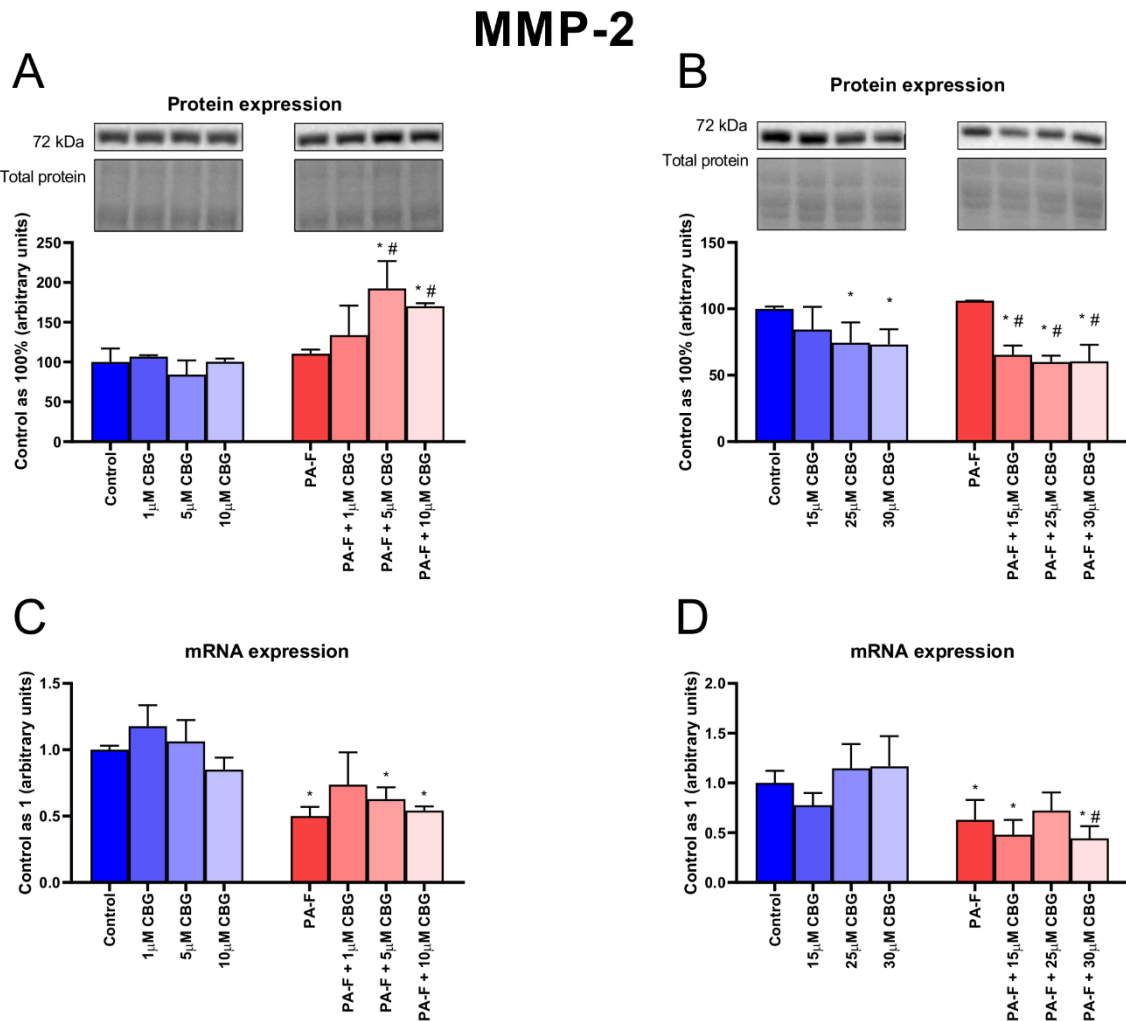

**Figure S2.** The influence of cannabigerol (CBG), in a concentration-dependent manner, on the matrix metalloproteinase 2 (MMP-2) protein expressions (A, B), mRNA expressions (C, D) in hepatocytes exposed to standard media (Control) or palmitate and fructose media (PA-F). The cells were treated with different concentrations of CBG for 48h. The MMP-2 protein and mRNA expression assays were performed by the Western blot and RT-PCR techniques, respectively. The data were expressed as mean  $\pm$  SD of six independent determinations and presented as a percentage of MMP-2 changes relative to the Control (set as 100% for Western blot and as 1 for RT-PCR). The significant differences were indicated in comparison with the Control group ( $^*p<0.05$ ) and PA-F group ( $^{\#}p<0.05$ ).

### 1.3. Concentration-dependent influence of cannabigerol on matrix metalloproteinase 9 changes in post-incubation media and primary rat hepatocytes exposed to palmitate in combination with fructose

The hepatocytes treatment with 1 $\mu$ M CBG, 5 $\mu$ M CBG and 10 $\mu$ M CBG in combination with the palmitate and fructose caused a decline in the MMP-9 protein expression (PA-F + 1 $\mu$ M CBG: -18.0% and -18.1%, PA-F + 5 $\mu$ M CBG: -26.3% and -26.3%, PA-F + 10 $\mu$ M CBG: -20.2% and -20.2%,  $p<0.05$ , Figure S3A) compared to the Control and PA-F groups, respectively. The MMP-9 protein expression was raised in the PA-F + 25 $\mu$ M CBG group (+11.1%,  $p<0.05$ , Figure S3B, vs. Control group).

The mRNA expression of MMP-9 was decreased in both PA-F groups (-42.9% and -48.3%,  $p<0.05$ , Figure S3C and S3D, respectively). The mRNA expression of MMP-2 was also significantly reduced in selected examined groups (10 $\mu$ M CBG: -28.6%, PA-F + 5 $\mu$ M CBG: -3.6%, 30 $\mu$ M CBG: -34.0%, PA-F +

15 $\mu$ M CBG: -54.7%, PA-F + 25 $\mu$ M CBG: -55.5%, PA-F + 30 $\mu$ M CBG: -63.2%,  $p < 0.05$ , Figure S3C and S3D) compared to the proper Control group. We noticed an increment in the MMP-9 mRNA expression in hepatocytes treated with 10 $\mu$ M CBG in the PA-F condition (+68.8%,  $p < 0.05$ , Figure 8C, vs. PA-F group). Our study also demonstrated a lower mRNA expression of MMP-9 after high concentrations of CBG treatment of cells exposed to palmitate and fructose media (PA-F + 15 $\mu$ M CBG: -12.5%, PA-F + 25 $\mu$ M CBG: -14.0%, PA-F + 30 $\mu$ M CBG: -28.8%,  $p < 0.05$ , Figure S3D) in comparison with the PA-F group.

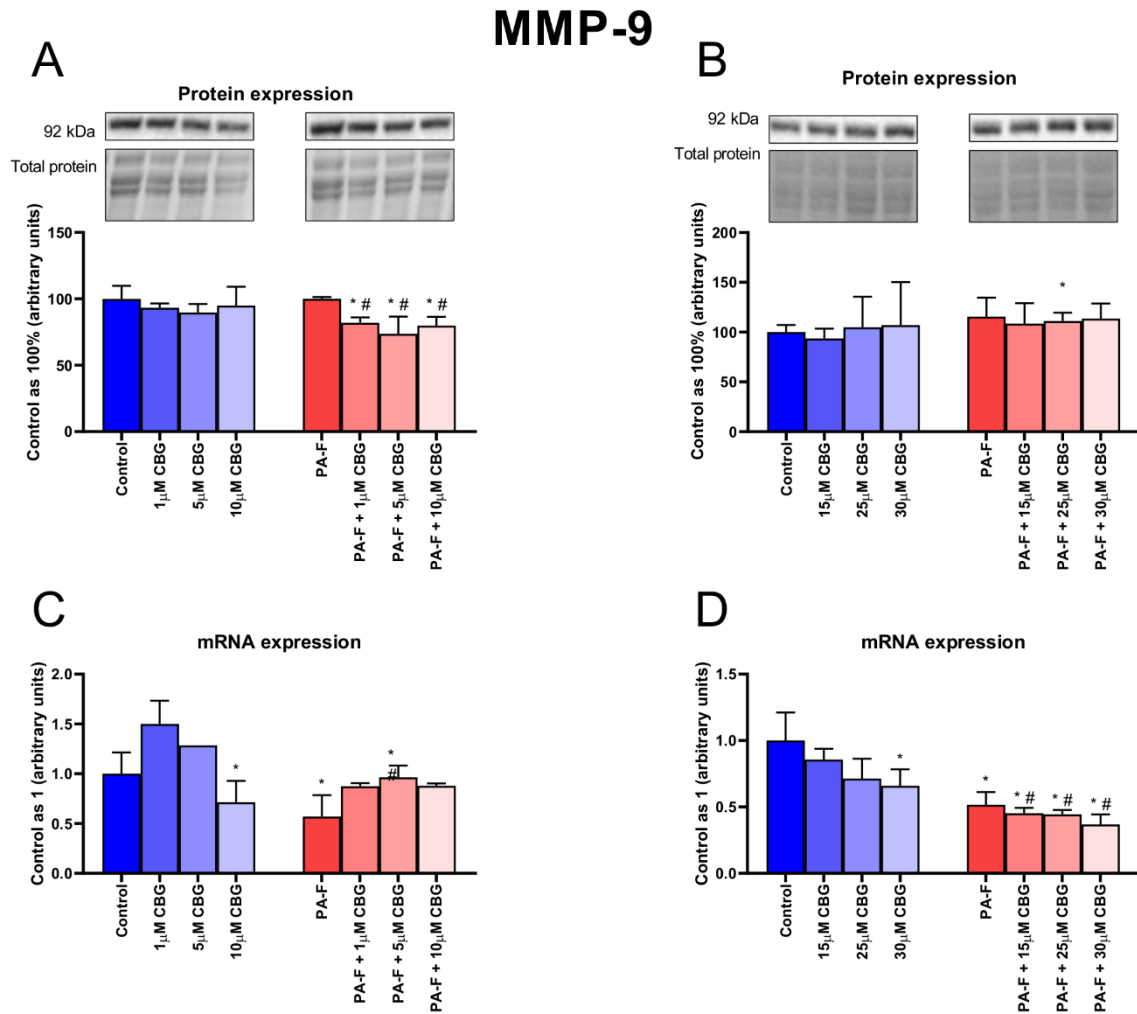

**Figure S3.** The influence of cannabigerol (CBG), in a concentration-dependent manner, on the matrix metalloproteinase 9 (MMP-9) protein expressions (A, B), mRNA expressions (C, D) in hepatocytes exposed to standard media (Control) or palmitate and fructose media (PA-F). The cells were treated with different concentrations of CBG for 48h. The MMP-9 protein and mRNA expression assays were performed by the Western blot and RT-PCR techniques, respectively. The data were expressed as mean  $\pm$  SD of six independent determinations and presented as a percentage of MMP-9 changes relative to the Control (set as 100% for Western blot and as 1 for RT-PCR). The significant differences were indicated in comparison with the Control group (\* $p < 0.05$ ) and PA-F group (\* $p < 0.05$ ).

#### 1.4. Concentration-dependent influence of cannabigerol on tissue inhibitor of metalloproteinase 1 changes in post-incubation media and primary rat hepatocytes exposed to palmitate in combination with fructose

The protein expression of TIMP-1 was changed only in two examined groups, i.e., PA + 15 $\mu$ M CBG and PA-F + 25 $\mu$ M CBG. There was an increment in hepatocytes incubated with 15 $\mu$ M CBG (+140.7% and +108.8%,  $p < 0.05$ , Figure S4B, vs. Control and PA-F groups, respectively) and a reduction in hepatocytes incubated with 25 $\mu$ M CBG (-20.7%,  $p < 0.05$ , Figure S4B, vs. Control group).

The mRNA expression of TIMP-1 was increased in both PA-F groups (+57.3% and +58.3%,  $p < 0.05$ , Figure S4C and S4D, respectively). The TIMP-1 mRNA expression was reduced after cells treatment

with low concentrations of CBG in the combination of palmitate and fructose (PA-F + 1 $\mu$ M CBG: -49.4%, PA-F + 5 $\mu$ M CBG: -53.9%, PA-F + 10 $\mu$ M CBG: -33.6%,  $p < 0.05$ , Figure S4C) than in the PA-F group. Moreover, in relation with the Control group, the TIMP-1 mRNA expression was declined after hepatocytes incubation with PA-F and 5 $\mu$ M CBG (-27.5%,  $p < 0.05$ , Figure S4C).

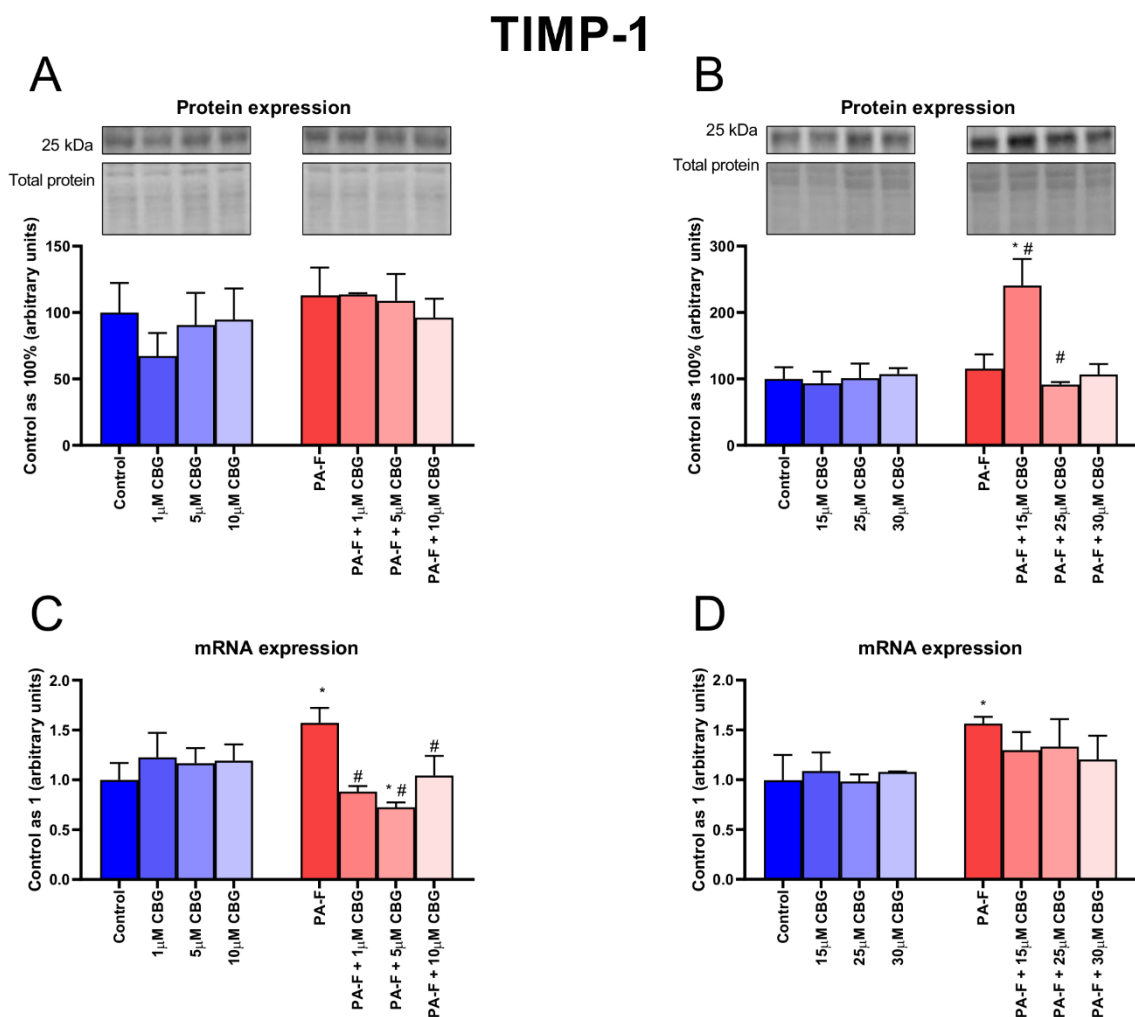

**Figure S4.** The influence of cannabigerol (CBG), in a concentration-dependent manner, on the tissue inhibitor of metalloproteinase 1 (TIMP-1) protein expressions (A, B), mRNA expressions (C, D) in hepatocytes exposed to standard media (Control) or palmitate and fructose media (PA-F). The cells were treated with different concentrations of CBG for 48h. The TIMP-1 protein and mRNA expression assays were performed by the Western blot and RT-PCR techniques, respectively. The data were expressed as mean  $\pm$  SD of six independent determinations and presented as a percentage of TIMP-1 changes relative to the Control (set as 100% for Western blot and as 1 for RT-PCR). The significant differences were indicated in comparison with the Control group (\* $p < 0.05$ ) and PA-F group (# $p < 0.05$ ).

#### 1.5. Concentration-dependent influence of cannabigerol on tissue inhibitor of metalloproteinase 2 changes in post-incubation media and primary rat hepatocytes exposed to palmitate in combination with fructose

In comparison with proper Control group the protein expression of TIMP-2 was decreased in the 5 $\mu$ M CBG, 10 $\mu$ M CBG, PA-F + 1 $\mu$ M CBG, PA + 5 $\mu$ M CBG, and PA + 5 $\mu$ M CBG groups (-29.4%, -28.5%, -31.3%, -23.1%, and -20.3%,  $p < 0.05$ , Figure S5A and S5B, respectively) and increased in the PA-F + 10 $\mu$ M CBG and PA-F + 30 $\mu$ M CBG groups (+16.5% and +27.9%,  $p < 0.05$ , Figure S5A and S5B, respectively). We also observed a diminishment in the TIMP-2 protein expression after treatment with 1 $\mu$ M CBG, 5 $\mu$ M CBG, 15 $\mu$ M CBG, and 25 $\mu$ M CBG in the PA-F condition (-40.7%, -33.6%, -32.4%, -8.9%,  $p < 0.05$ , Figure S5A and S5B) than in the PA-F group.

The mRNA expression of TIMP-2 was decreased in the PA-F + 1 $\mu$ M CBG, PA-F + 5 $\mu$ M CBG, PA-F + 15 $\mu$ M CBG, and PA-F + 25 $\mu$ M CBG groups (-20.4%, -28.1%, -20.4% and -12.8%,  $p < 0.05$ , Figure S5C and S5D, respectively) in comparison with the proper Control group. In relation to the PA-F group, the TIMP-2 mRNA expression was attenuated by cannabigerol treatment with the following groups: PA-F + 1 $\mu$ M CBG, PA-F + 5 $\mu$ M CBG, and PA-F + 15 $\mu$ M CBG (-21.9%, -29.4%, and -19.3%,  $p < 0.05$ , Figure S5C and S5D, respectively).

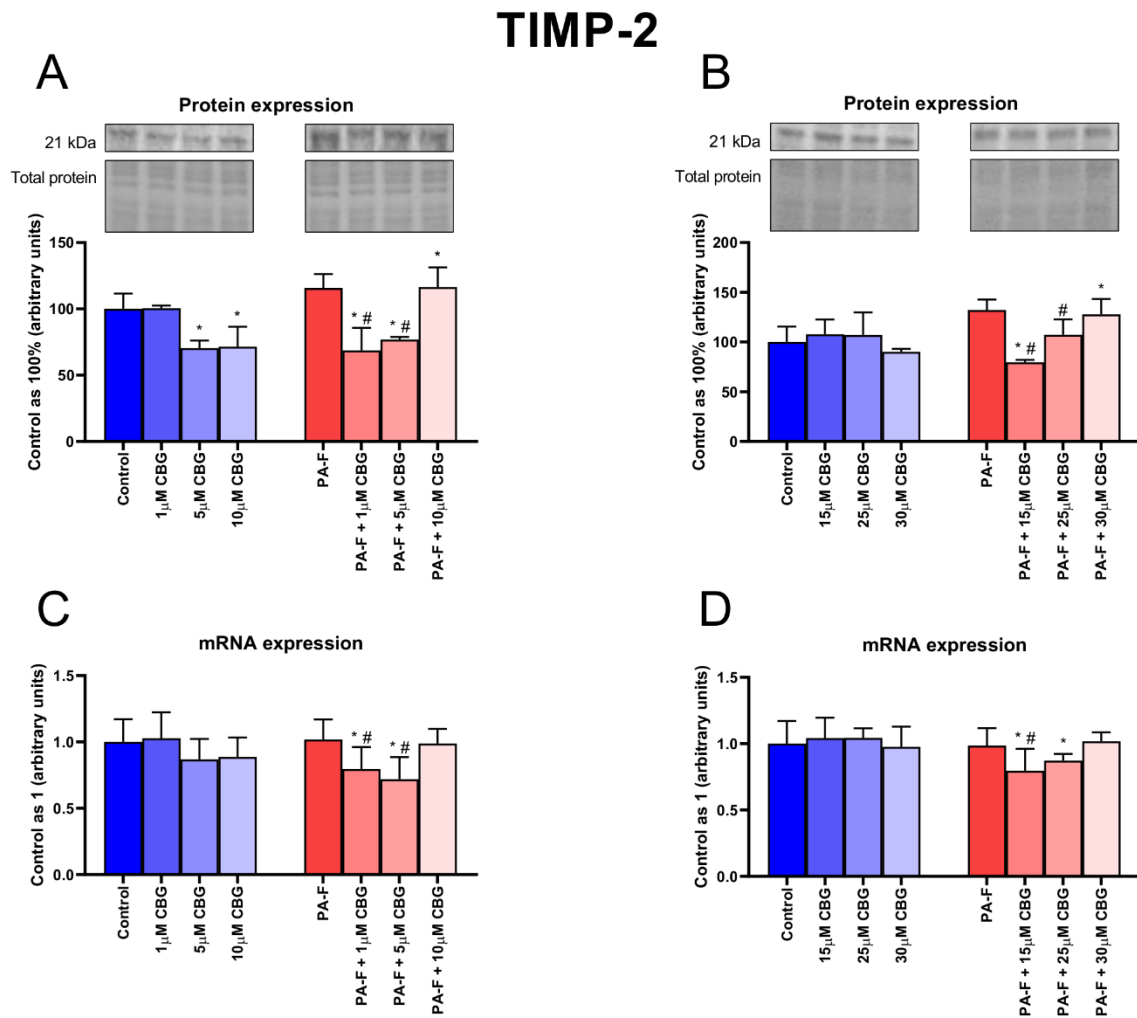

**Figure S5.** The influence of cannabigerol (CBG), in a concentration-dependent manner, on the tissue inhibitor of metalloproteinase 2 (TIMP-2) protein expressions (A, B), mRNA expressions (C, D) in hepatocytes exposed to standard media (Control) or palmitate and fructose media (PA-F). The cells were treated with different concentrations of CBG for 48h. The TIMP-2 protein and mRNA expression assays were performed by the Western blot and RT-PCR techniques, respectively. The data were expressed as mean  $\pm$  SD of six independent determinations and presented as a percentage of TIMP-2 changes relative to the Control (set as 100% for Western blot and as 1 for RT-PCR). The significant differences were indicated in comparison with the Control group (\* $p < 0.05$ ) and PA-F group (\* $p < 0.05$ ).
